# Supplementary material for: Synthesis of ketoximes via a solvent-assisted and robust mechanochemical pathway
Source: Royal Society of Chemistry journal article supplement (doi:10.1039/c3ra40585k), 2013-01-01
Supplement: c3ra40585k.pdf [file c3ra40585k.pdf]

# **Synthesis of ketoximes via a solvent-assisted and robust mechanochemical pathway**

**Christer B. Aakeröy,<sup>a</sup> Abhijeet S. Sinha**

Department of Chemistry, Kansas State University, Manhattan, KS 66506

[aakeroy@ksu.edu](mailto:aakeroy@ksu.edu)

## **Supporting Information**

## Table of contents

|                                         |       |
|-----------------------------------------|-------|
| General experimental details.....       | S3    |
| General synthesis of the ketoximes..... | S4-S6 |
| Characterization of the ketoximes.....  | S7    |

## General experimental details

<sup>1</sup>H NMR spectra were recorded on a Varian Unity plus 400 MHz spectrometer in CDCl<sub>3</sub> or d<sub>6</sub>-DMSO. Data is expressed in parts per million (ppm) downfield shift from tetramethylsilane or residual protiosolvent as internal reference and are reported as position (in ppm), multiplicity (s = singlet, d = doublet, t = triplet, m= multiplet), coupling constant (J in Hz) and integration (number of protons). Melting points were recorded on a Fisher-Johns melting point apparatus and are uncorrected. All the chemicals were purchased from Aldrich and used without further purification, unless otherwise noted.

| #  | Physical state of reactant | Reactant                                                                            | Physical state of ground mixture | Product                                                                               |
|----|----------------------------|-------------------------------------------------------------------------------------|----------------------------------|---------------------------------------------------------------------------------------|
| 1  | Liquid                     | 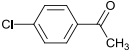   | White solid                      |    |
| 2  | Solid                      |    | Yellow solid                     |    |
| 3  | Liquid                     |    | Yellow solid                     |    |
| 4  | Solid                      |    | Brown solid                      |    |
| 5  | Solid                      |    | White solid                      |    |
| 6  | Liquid                     |    | White solid                      |    |
| 7  | Liquid                     |    | White solid                      |    |
| 8  | Solid                      |    | Viscous yellow solid             |    |
| 9  | Liquid                     |    | White solid                      |    |
| 10 | Solid                      |    | Yellow solid                     |    |
| 11 | Solid                      |   | Yellow solid                     |   |
| 12 | Liquid                     |  | White solid                      |  |
| 13 | Liquid                     |  | White solid                      |  |
| 14 | Liquid                     |  | White solid                      |  |
| 15 | Solid                      |  | White solid                      |  |
| 16 | Solid                      |  | White solid                      |  |
| 17 | Solid                      |  | White solid                      |  |
| 18 | Liquid                     |  | Viscous white solid              |  |
| 19 | Liquid                     |  | Viscous white solid              |  |
| 20 | Liquid                     |  | White solid                      |  |

### **General synthetic method for 2, 4-6, 8, 11, 13-14, 17**

In a mortar, 1.0 mmole of the ketone and 1.2 mmoles (per ketone present) of hydroxylamine hydrochloride is ground together with a pestle. Then, 1.2 mmoles (per ketone present) of crushed sodium hydroxide is added and the mixture is ground further with the addition of 0.1-0.2 mL methanol, for 2 minutes at room temperature. The reaction mixture is left for 5 minutes, after which it is ground for another 2 minutes with 0.1-0.2 mL methanol. At this stage the reaction is monitored by TLC. Upon completion of the reaction, a  $^1\text{H}$  NMR spectrum of the crude mixture is taken in  $\text{d}_6$  DMSO to confirm the formation of ketoxime. The crude mixture is washed with water to get rid of any inorganic salts and it is air dried, after which the melting point is taken to confirm the formation of pure product.

### **General synthetic method for 1, 3, 7, 9-10, 12, 15-16**

In a mortar, 1.0 mmole of the ketone and 2.4 mmoles (per ketone present) of hydroxylamine hydrochloride is ground together with a pestle. Then, 2.4 mmoles (per ketone present) of crushed sodium hydroxide is added and the mixture is ground further with the addition of 0.1-0.2 mL methanol, for 2 minutes at room temperature. The reaction mixture is left for 5 minutes, after which it is ground for another 2 minutes with 0.1-0.2 mL methanol. At this stage the reaction is monitored by TLC. Upon completion of the reaction, a  $^1\text{H}$  NMR spectrum of the crude mixture is taken in  $\text{d}_6$  DMSO to confirm the formation of ketoxime. The crude mixture is washed with water to get rid of any inorganic salts and it is air dried, after which the melting point is taken to confirm the formation of pure product.

### **General synthetic method for 18-20**

In a mortar, 1.0 mmole of the ketone and 1.2 mmoles (per ketone present) of hydroxylamine hydrochloride is ground together with a pestle. Then, 1.2 mmoles (per ketone present) of crushed sodium hydroxide is added and the mixture is ground further with the addition of 0.1-0.2 mL methanol, for 2 minutes at room temperature. The reaction mixture is left for 5 minutes, after which it is ground for

another 2 minutes with 0.1-0.2 mL methanol. At this stage the reaction is monitored by TLC. Upon completion of the reaction, a  $^1\text{H}$  NMR spectrum of the crude mixture is taken in  $\text{d}_6$  DMSO to confirm the formation of ketoxime. The crude mixture is washed with chloroform to extract the water soluble products. The filtrate is evaporated to obtain the compound, after which the melting point is taken to confirm the formation of pure product.

## Characterization of the ketoximes

**4-acetylbenzoxime (5):**  $^1\text{H}$  NMR ( $\delta\text{H}$ ;  $\text{d}_6$  DMSO, 400MHz): 2.17 (3 H, s), 7.81-7.88 (4 H, m), 11.67 (1 H, br. s.).

**2-pentanone oxime (18):**  $^1\text{H}$  NMR ( $\delta\text{H}$ ;  $\text{d}_6$  DMSO, 400MHz): 0.85 (3 H, m), 1.44 (2 H, m), 1.70 (3 H, s), 2.06 (2 H, m), 10.21 (1 H, br. s.).
